# Supplementary material
Source: PubMed Central journal article supplement (PMC5850319)

**Figure S1.** Phylogenetic analysis (FastTree) of selected horizontally-acquired genes in *D. oralis*. Closest sequence homologues from other bacteria (based on Blast) were used. For most genes proposed to have been horizontally acquired there were no close homologues in other *Desulfobulbus* genomes. The numbers indicate node support.

**succinate:acetate-CoA transferase**

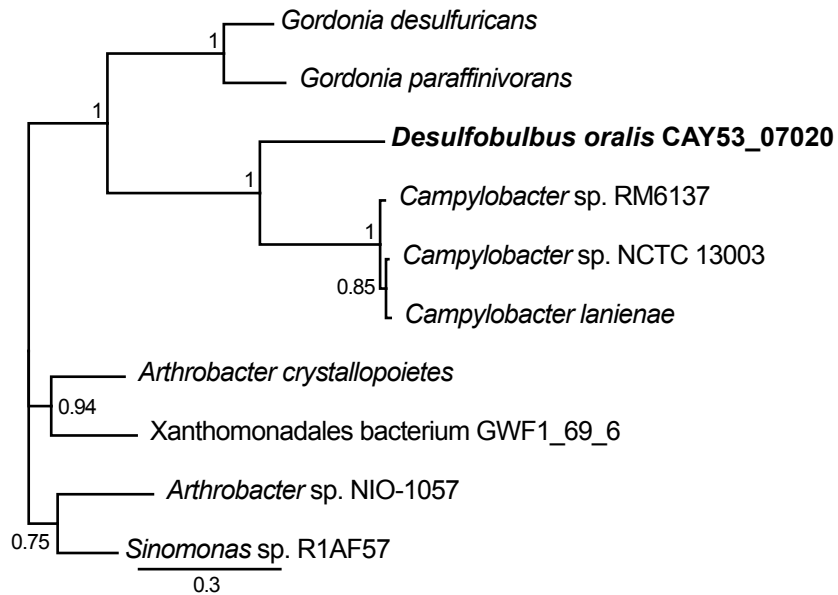

**Sel1 domain-containing proteins**

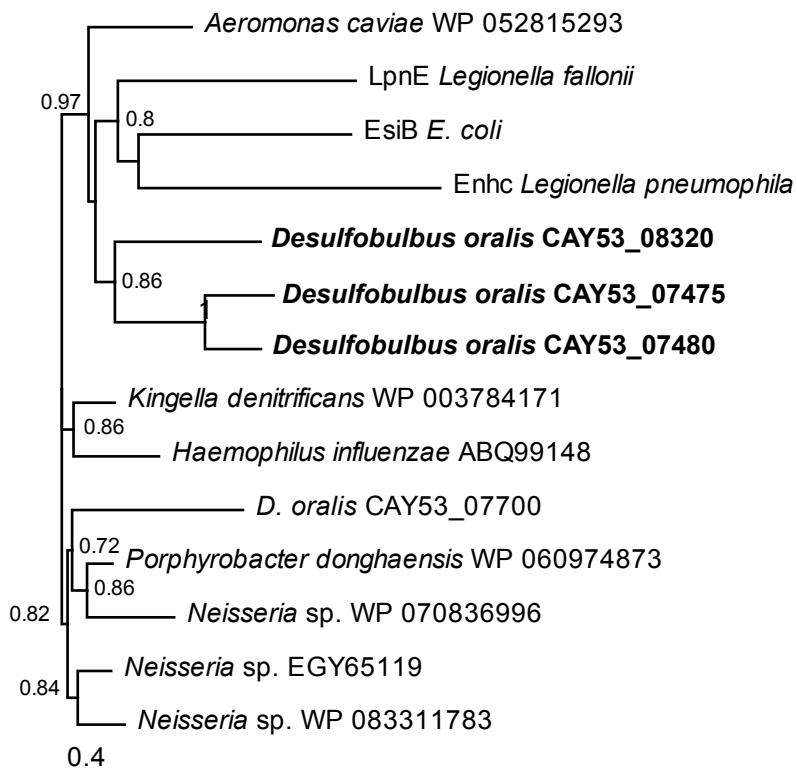

**Supplementary Figure 1 (cont.)**

**Heterodisulfide reductase subunit A**

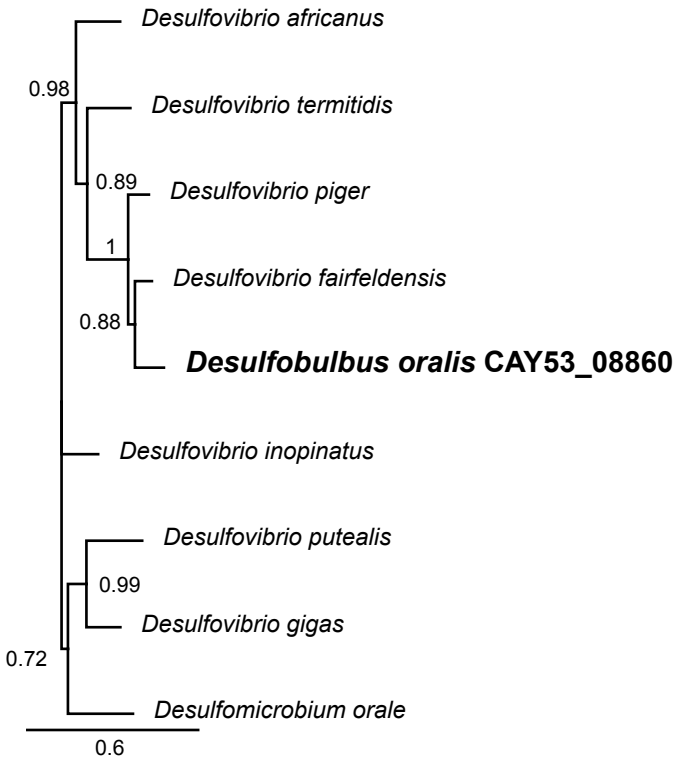

**NCS2 family permease**

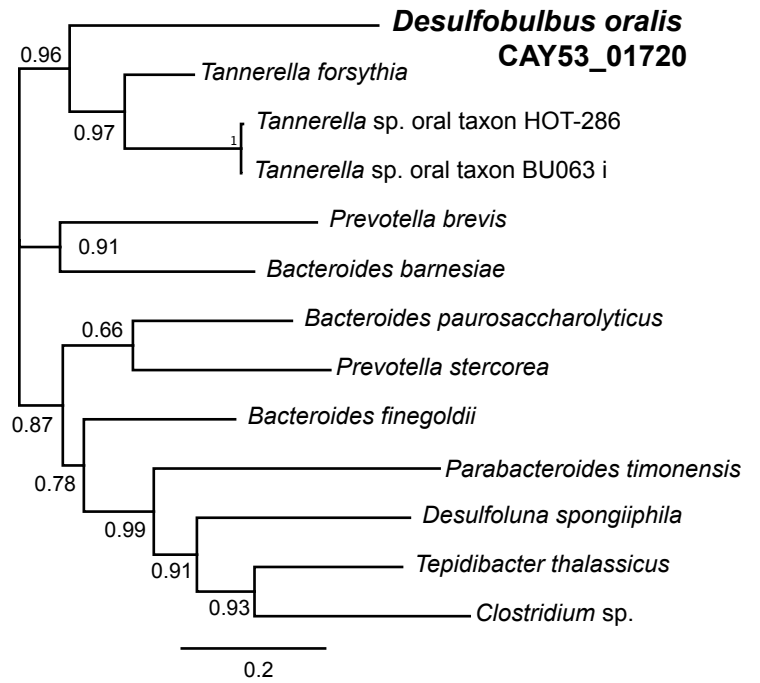

**AAT family amino acid transporter**

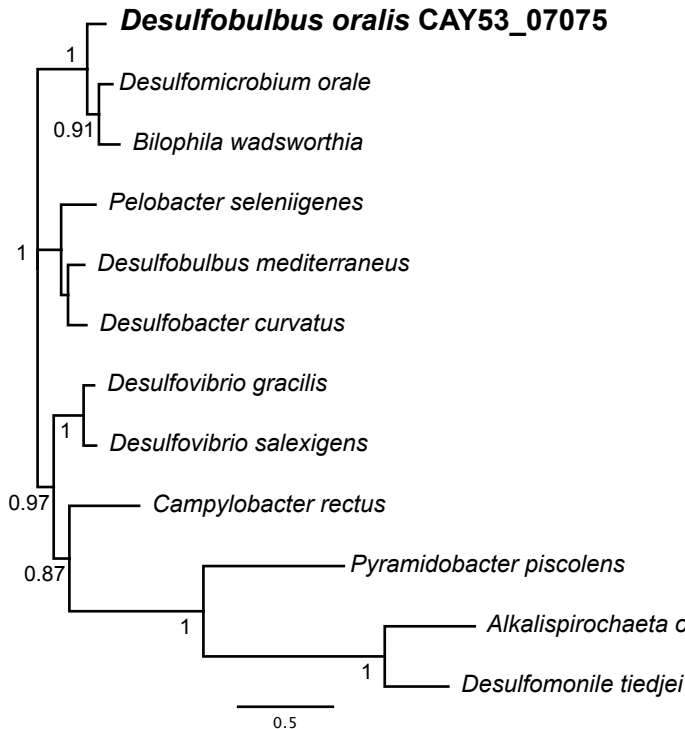

**Competence protein TfoX**

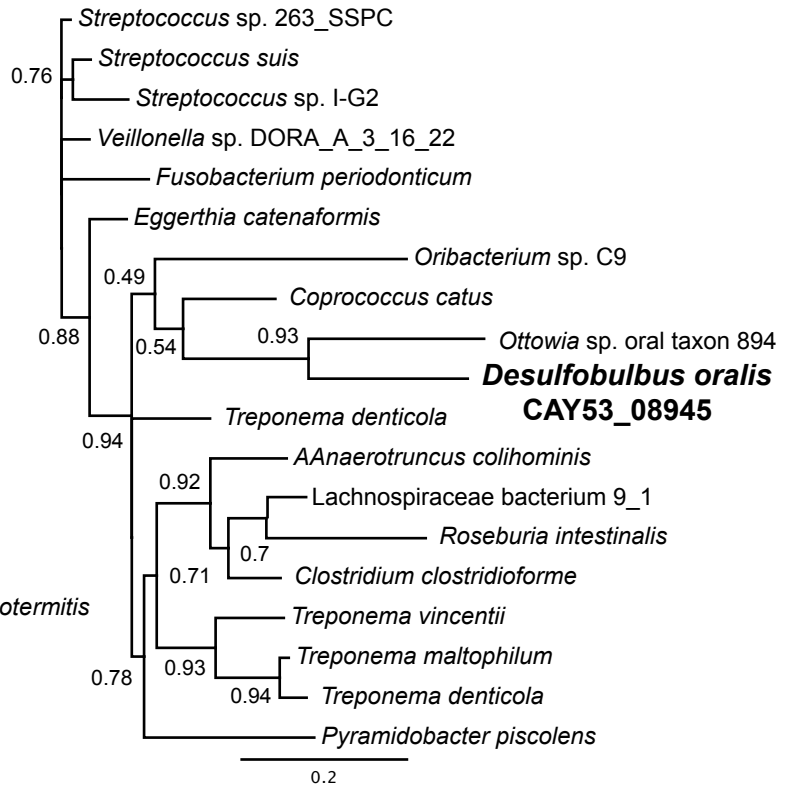

## Supplementary Figure 1 (cont.)

### Ankyrin repeat domain-containing proteins

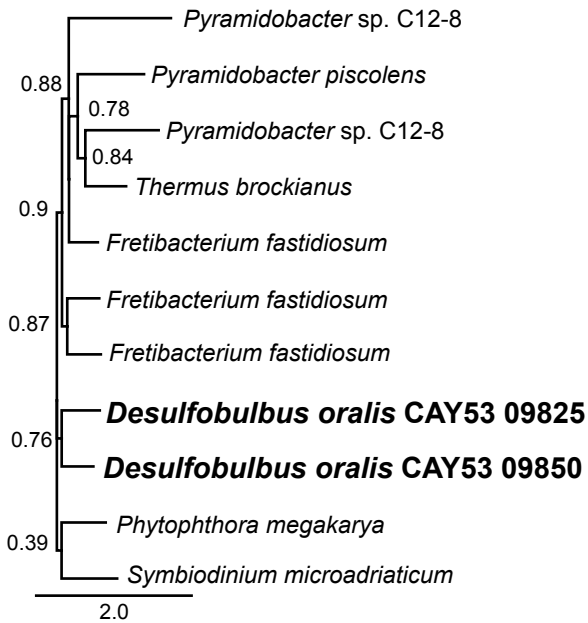

### Bacterial conjugation protein TrbI

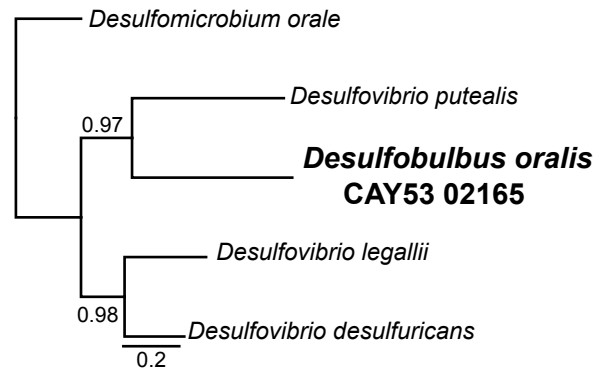

### Outer membrane lipoprotein-sorting protein

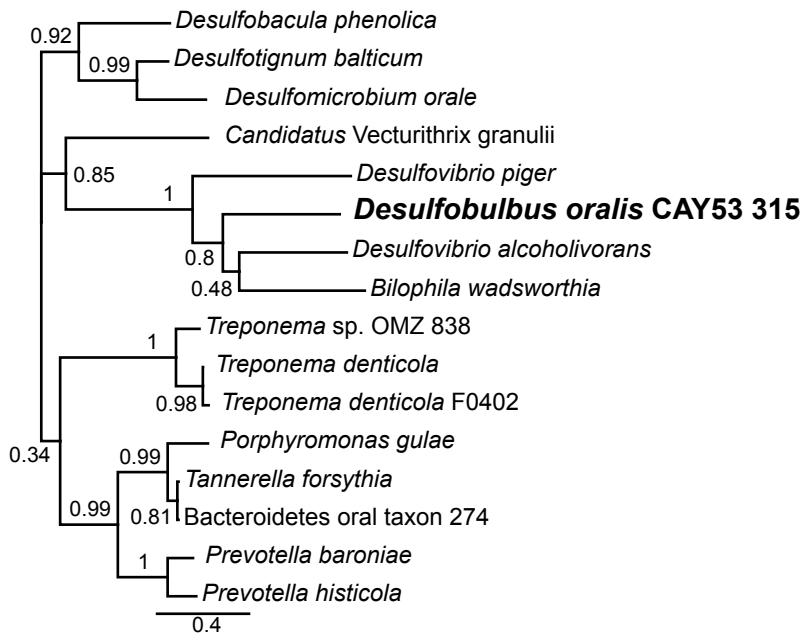

### Hemolysin-related protein

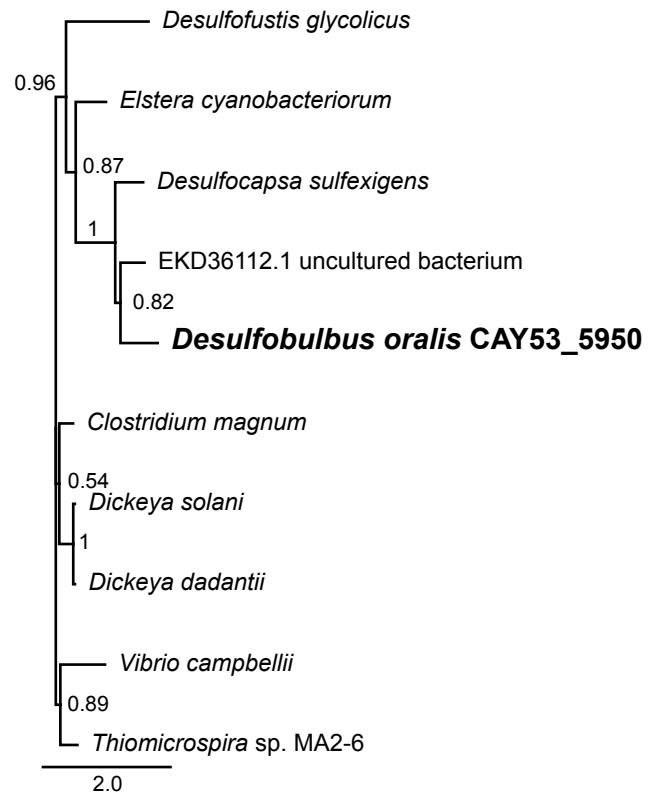

Supplement: mbo002183769sf1.pdf [file mbo002183769sf1.pdf]
