# Supplementary material
Source: PubMed Central journal article supplement (PMC5850319)
Supplement: mbo002183769sf3.pdf [file mbo002183769sf3.pdf]

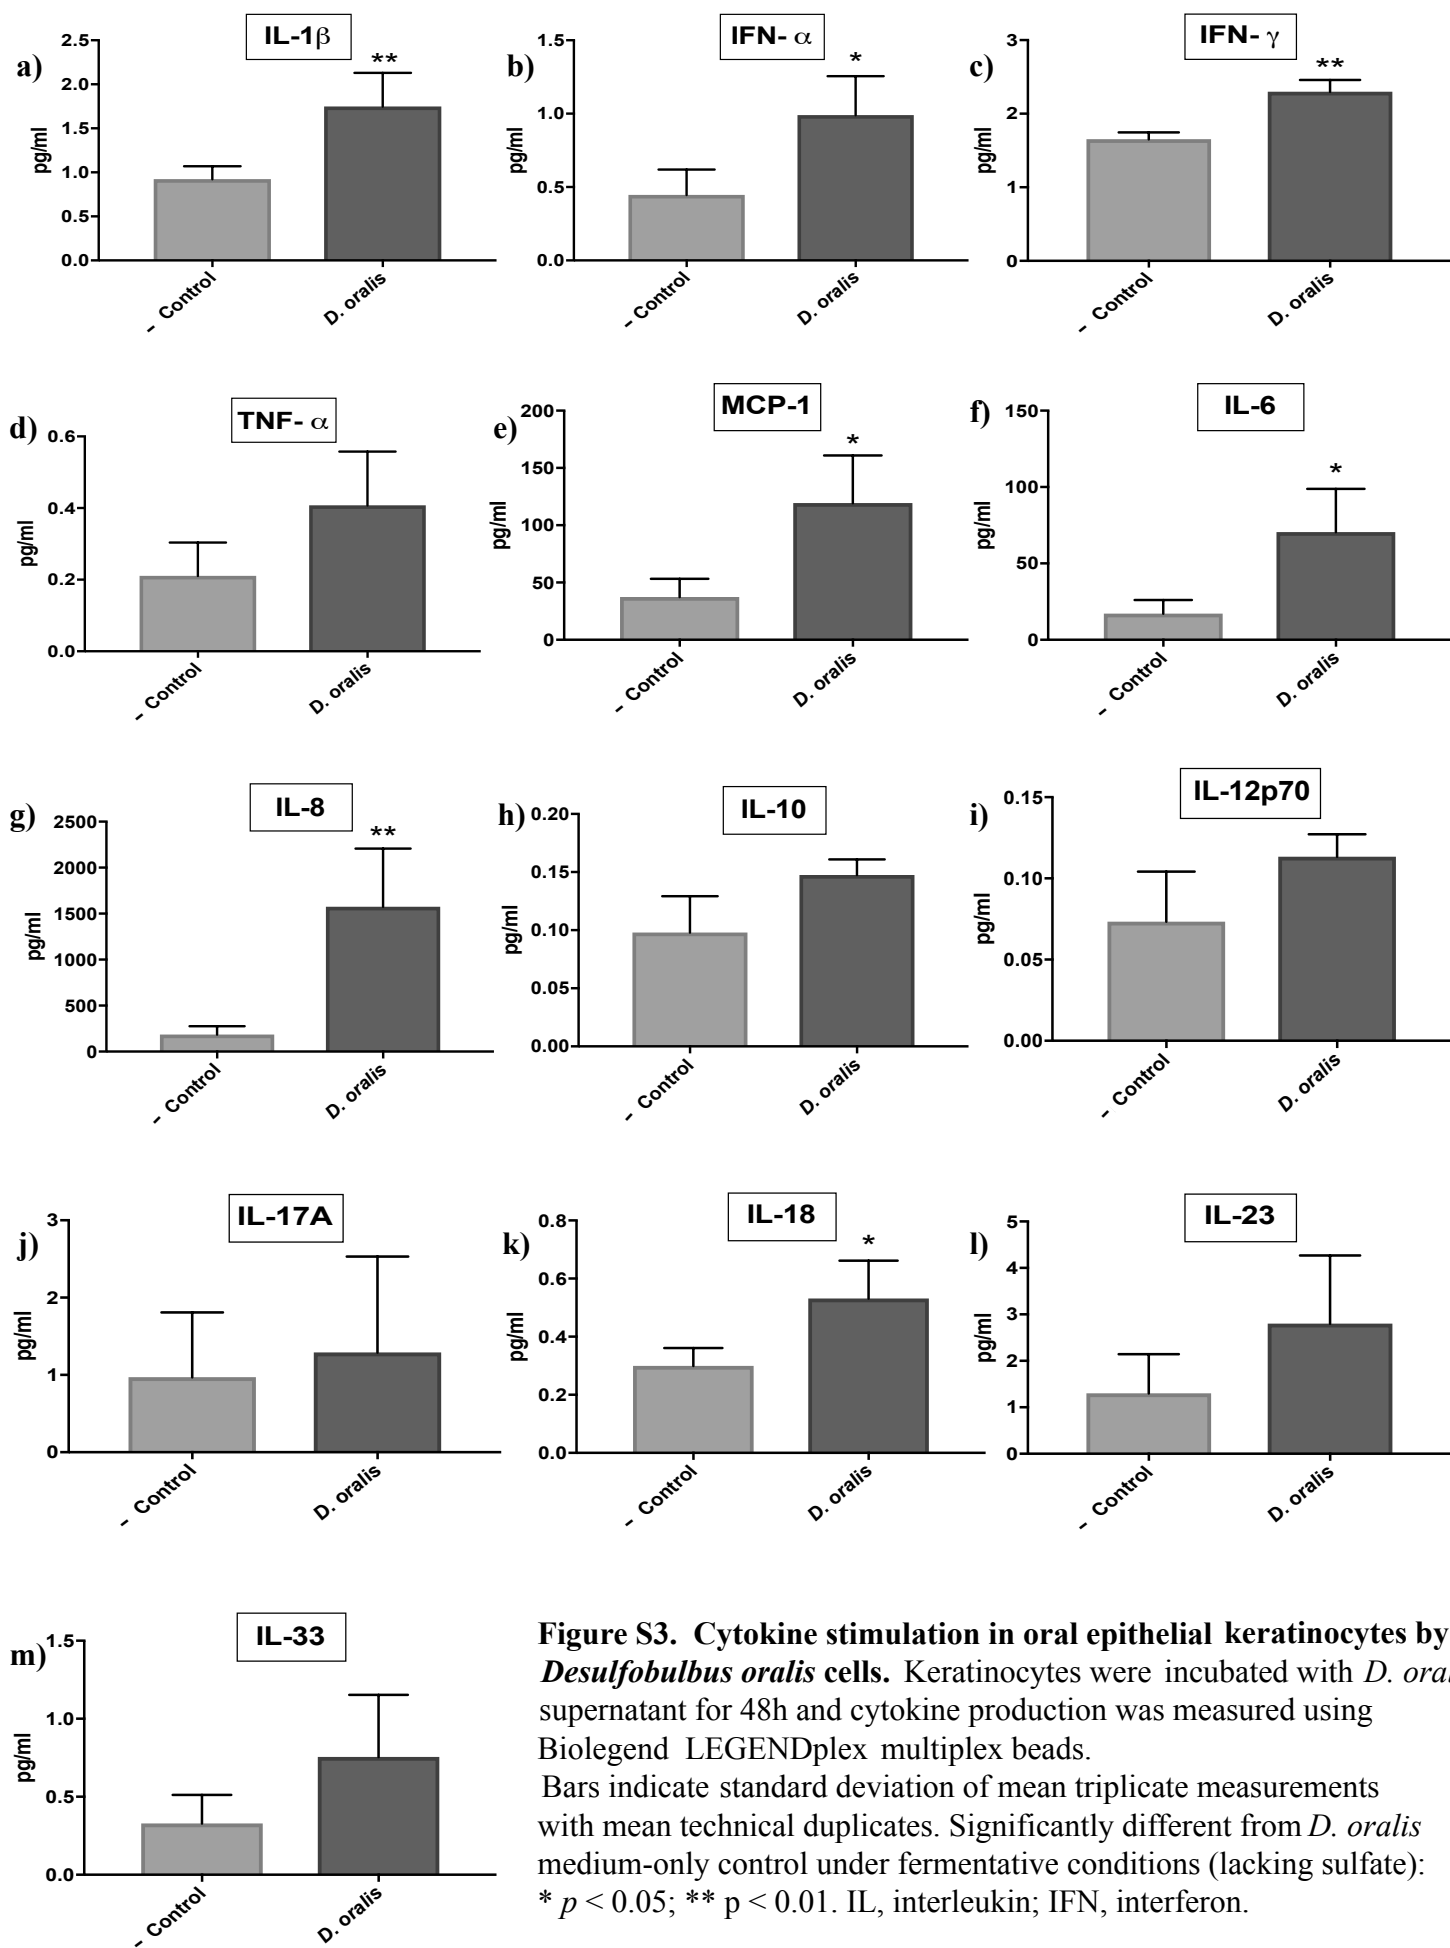

**Figure S3. Cytokine stimulation in oral epithelial keratinocytes by *Desulfobulbus oralis* cells.** Keratinocytes were incubated with *D. oralis* supernatant for 48h and cytokine production was measured using Biogenex LEGENDplex multiplex beads.

Bars indicate standard deviation of mean triplicate measurements with mean technical duplicates. Significantly different from *D. oralis* medium-only control under fermentative conditions (lacking sulfate): \*  $p < 0.05$ ; \*\*  $p < 0.01$ . IL, interleukin; IFN, interferon.
