# Supplementary material
Source: PubMed Central journal article supplement (PMC5850319)
Supplement: mbo002183769st1.pdf [file mbo002183769st1.pdf]

**Table 1** | *D. oralis* physiological characteristics compared to related species of the *Desulfobulbus* genus

| Characteristic                                                         | <i>D. oralis</i>         | <i>D. oligotrophicus</i> | <i>D. propionicus</i>   | <i>D. elongatus</i> | <i>D. rhabdoformis</i>       | <i>D. japonicus</i> |
|------------------------------------------------------------------------|--------------------------|--------------------------|-------------------------|---------------------|------------------------------|---------------------|
| <b>Source</b>                                                          | Human subgingival sample | Municipal sewage sludge  | Anoxic freshwater ditch | Industrial digester | Water-oil separations system | Estuarine sediment  |
| <b>Cell shape</b>                                                      | Rod-shaped               | Oval-rods                | Lemon-shaped            | Rod-shaped          | Rod-shaped                   | Rod-shaped          |
| <b>Motility</b>                                                        | -                        | +                        | -                       | +                   | -                            | +                   |
| <b>Growth conditions:</b>                                              |                          |                          |                         |                     |                              |                     |
| <b>Temperature (°C)</b>                                                | 37°C                     | 35°C                     | 39°C                    | 35°C                | 31°C                         | 35°C                |
| <b>pH</b>                                                              | 7.1                      | 7.6                      | 7.2                     | 7.0                 | 6.8-7.2                      | 6.7                 |
| <b>Utilization of electron donors:</b>                                 |                          |                          |                         |                     |                              |                     |
| <b>Lactate</b>                                                         | +                        | +                        | +                       | +                   | +                            | +                   |
| <b>Pyruvate</b>                                                        | +                        | +                        | +                       | +                   | +                            | +                   |
| <b>Propionate</b>                                                      | -                        | +                        | +                       | +                   | +                            | +                   |
| <b>Acetate</b>                                                         | -                        | -                        | -                       | -                   | -                            | -                   |
| <b>Malate</b>                                                          | -                        | -                        | -                       | -                   | +                            | +                   |
| <b>Ethanol</b>                                                         | -                        | -                        | +                       | +                   | +                            | +                   |
| <b>Propanol</b>                                                        | -                        | -                        | +                       | +                   | +                            | +                   |
| <b>Formate</b>                                                         | -                        | -                        | -                       | -                   | -                            | +                   |
| <b>Succinate</b>                                                       | -                        | -                        | -                       | -                   | +                            | -                   |
| <b>Fumarate</b>                                                        | -                        | -                        | -                       | -                   | +                            | +                   |
| <b>Glucose</b>                                                         | -                        | -                        | -                       | -                   | ND                           | +                   |
| <b>Fructose</b>                                                        | -                        | -                        | -                       | -                   | ND                           | +                   |
| <b>H<sub>2</sub> + CO<sub>2</sub> Acetate</b>                          | -                        | -                        | +                       | +                   | +                            | +                   |
| <b>Utilization of electron acceptors</b>                               |                          |                          |                         |                     |                              |                     |
| <b>Sulfate</b>                                                         | +                        | +                        | +                       | +                   | +                            | +                   |
| <b>Thiosulfate</b>                                                     | +                        | +                        | +                       | +                   | +                            | +                   |
| <b>Sulfite</b>                                                         | -                        | +                        | +                       | +                   | +                            | -                   |
| <b>Nitrate</b>                                                         | -                        | -                        | +                       | -                   | -                            | ND                  |
| <b>Utilization of substrates in the absence of electron acceptors:</b> |                          |                          |                         |                     |                              |                     |
| <b>Pyruvate</b>                                                        | +                        | +                        | +                       | +                   | +                            | +                   |
| <b>Lactate</b>                                                         | -                        | +                        | +                       | +                   | +                            | +                   |
| <b>Glucose</b>                                                         | -                        | ND                       | ND                      | ND                  | ND                           | +                   |
| <b>DNA G+C content (mol%)</b>                                          | 59.8                     | 51.7                     | 58.9                    | 59                  | 50.6                         | 48.6                |
| <b>Genome size (Mbp)</b>                                               | 2.8                      | ND                       | 3.8                     | 3.9                 | ND                           | 5.8                 |
| <b>Genome status</b>                                                   | complete                 | ND                       | complete                | draft               | ND                           | draft               |
| <b>Isolation Reference</b>                                             | This study               | El Houari, 2017          | Widdel, 1982            | Samain, 1984        | Lien, 1998                   | Suzuki, 2007        |
